# Supplementary material for: Basal and starvation-induced autophagy mediates parasite survival during intraerythrocytic stages of Plasmodium falciparum
Source: PubMed Central journal article supplement (PMC6170468; doi:10.1038/s41420-018-0107-9), 2018-10-03

# Supplementary Figure S1

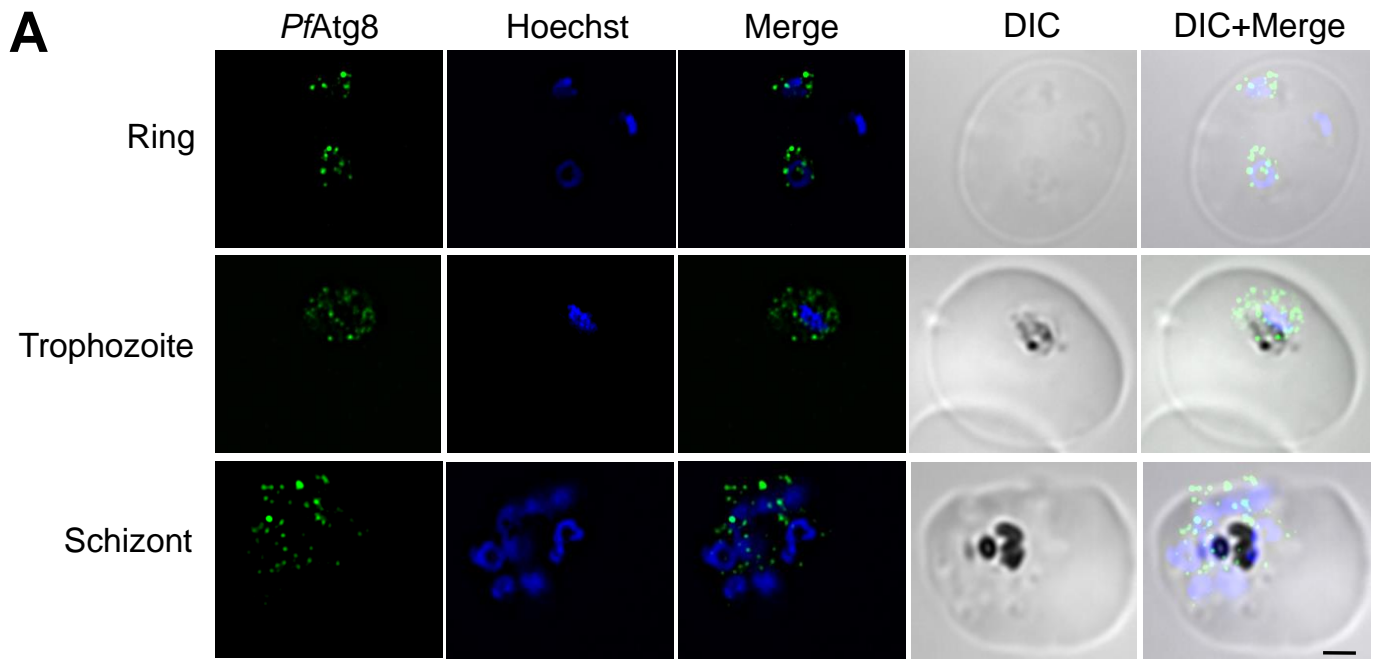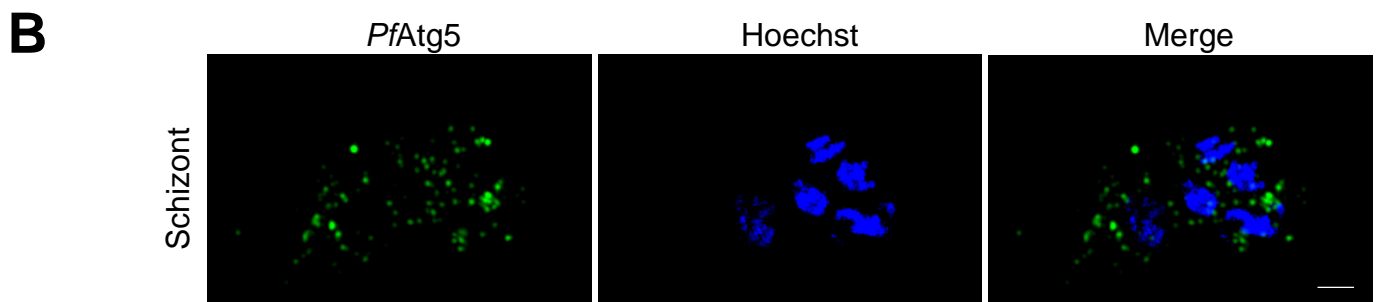

# Supplementary Figure S2

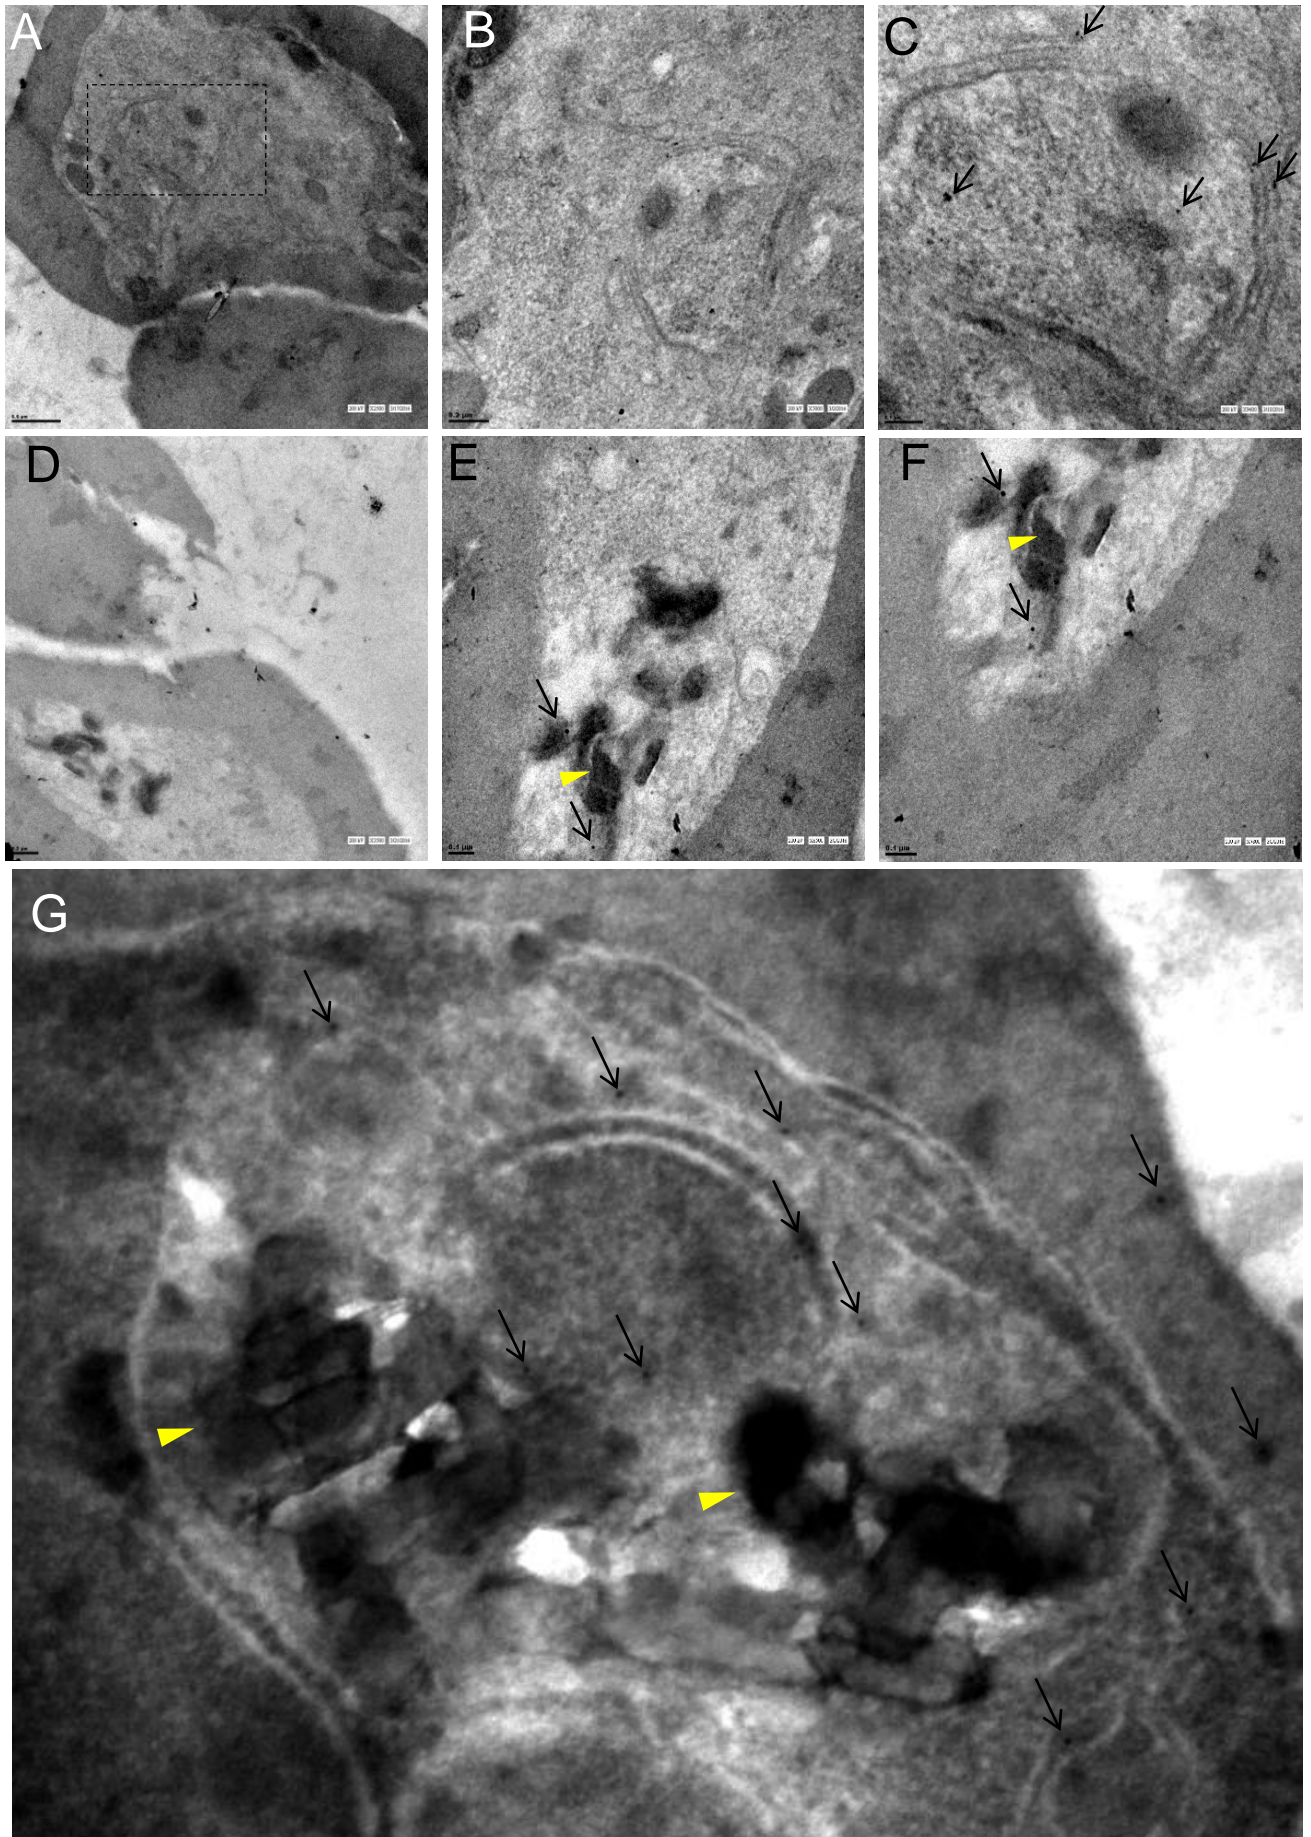

# Supplementary Figure S3

**A**

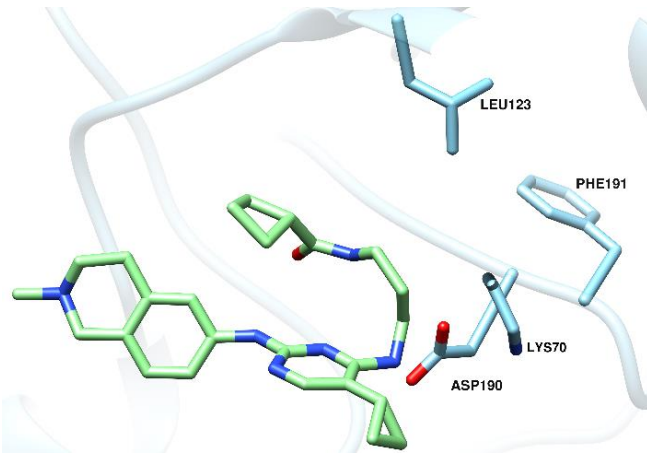

**B**

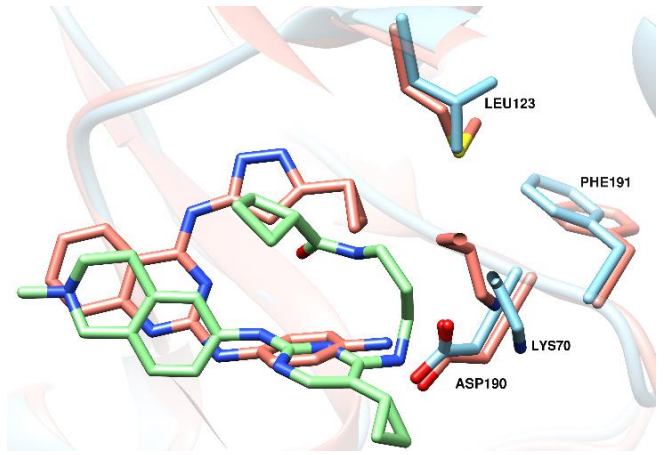

**C**

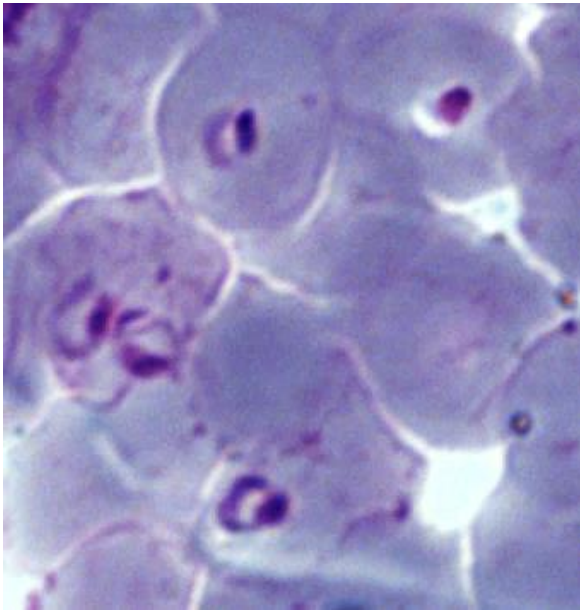

**D**

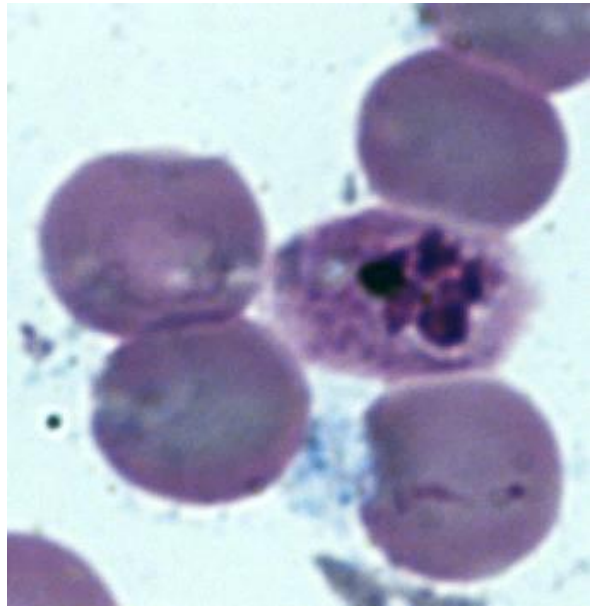



# Supplementary Figure S4

**A**

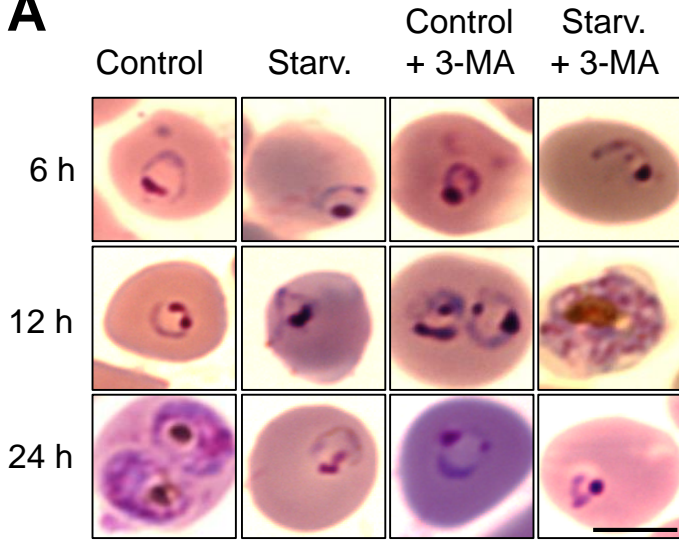

**B**

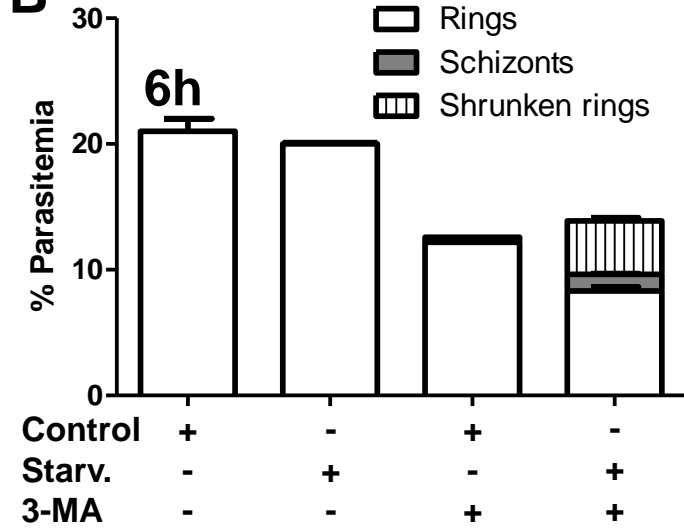

**C**

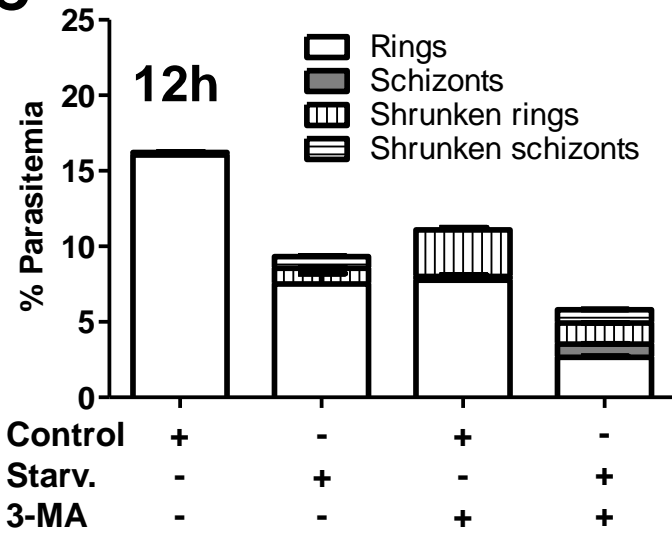

**D**

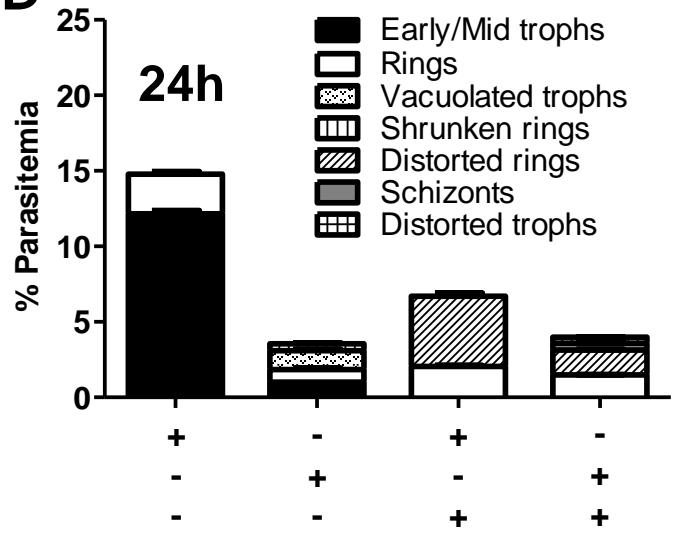

1C

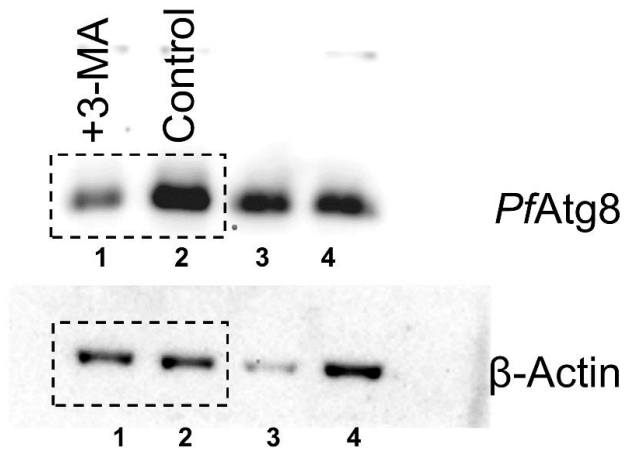

2C

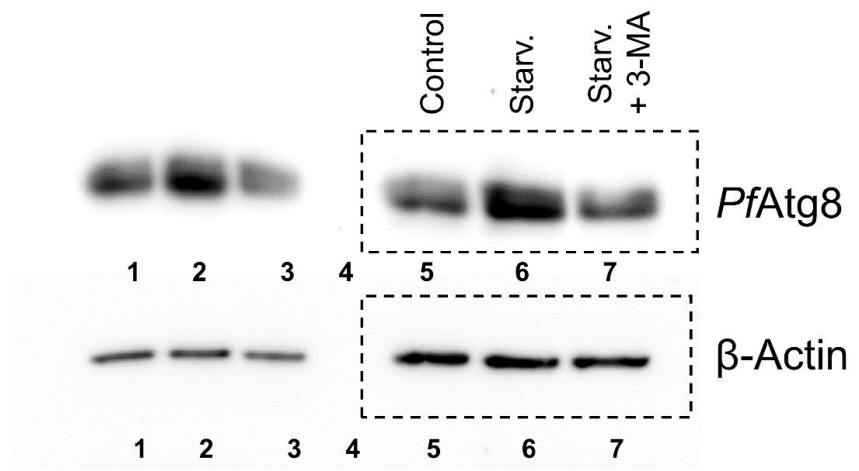

3A

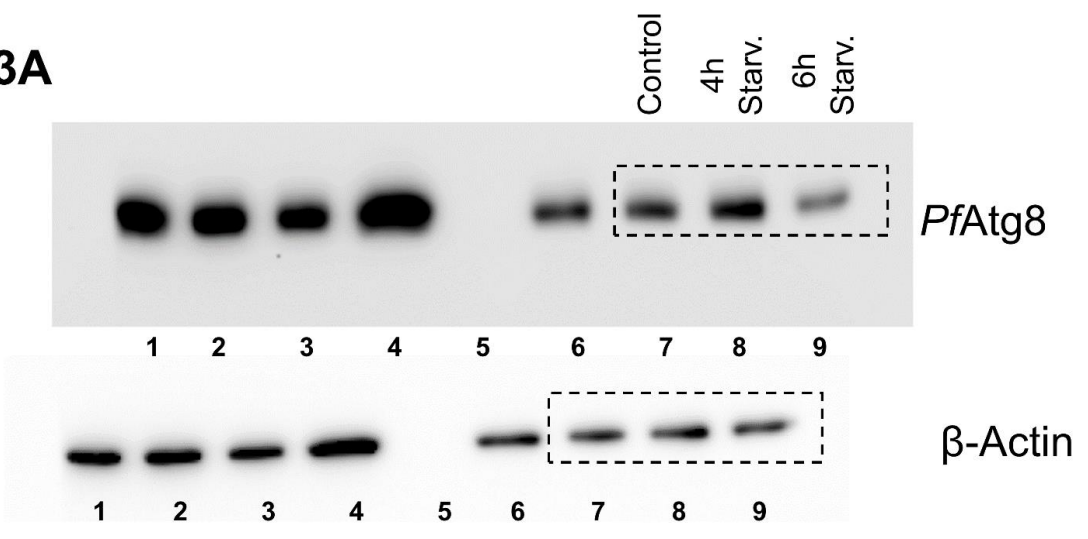

Supplement: 41420_2018_107_MOESM2_ESM.pdf [file 41420_2018_107_MOESM2_ESM.pdf]
